# Supplementary material
Source: PubMed Central journal article supplement (PMC7902386)
Supplement: NIHMS1664491-supplement-Supporting_Information.pdf [file NIHMS1664491-supplement-Supporting_Information.pdf]

## Supporting Information

### CHARMM-GUI Supports Hydrogen Mass Repartitioning and Different Protonation States of Phosphates in LPS

Ya Gao<sup>1†</sup>, Jumin Lee<sup>2†</sup>, Iain Peter Shand Smith<sup>3†</sup>, Hwayoung Lee<sup>2†</sup>, Seonghoon Kim<sup>2,4</sup>, Yifei Qi<sup>5</sup>, Jeffery B. Klauda<sup>6</sup>, Göran Widmalm<sup>7</sup>, Syma Khalid<sup>3</sup>, and Wonpil Im<sup>2\*</sup>

<sup>†</sup>These authors contributed equally to this work.

<sup>1</sup>School of Mathematics, Physics and Statistics, Shanghai University of Engineering Science, Shanghai 201620, China

<sup>2</sup>Department of Biological Sciences, Department of Chemistry, Department of Bioengineering, and Department of Computer Science and Engineering, Lehigh University, Bethlehem, PA 18015, USA

<sup>3</sup>School of Chemistry, University of Southampton, Southampton, S017 1BJ, UK

<sup>4</sup>School of Computational Sciences, Korea Institute for Advanced Study, Seoul 02455, Republic of Korea

<sup>5</sup>Shanghai Engineering Research Center of Molecular Therapeutics and New Drug Development, School of Chemistry and Molecular Engineering, East China Normal University, Shanghai, 200062, China

<sup>6</sup>Department of Chemical and Biomolecular Engineering and the Biophysics Program, University of Maryland College Park, Maryland 20742, USA

<sup>7</sup>Department of Organic Chemistry, Arrhenius Laboratory, Stockholm University, SE-10691 Stockholm, Sweden

\*Correspondence: [wonpil@lehigh.edu](mailto:wonpil@lehigh.edu)

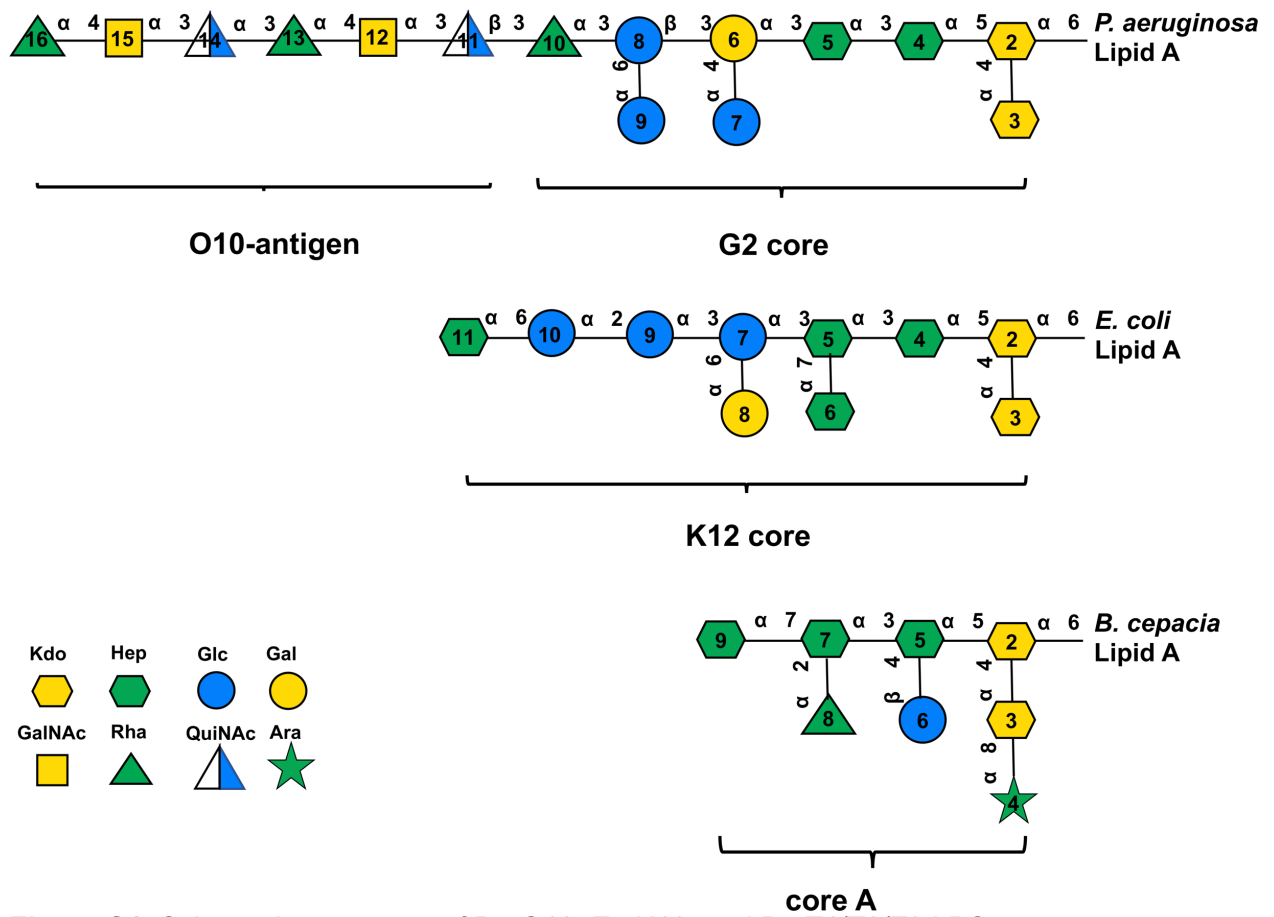

**Figure S1.** Schematic structures of Pa-O10, Ec-K12, and Bc-T1/T2/T3 LPS.

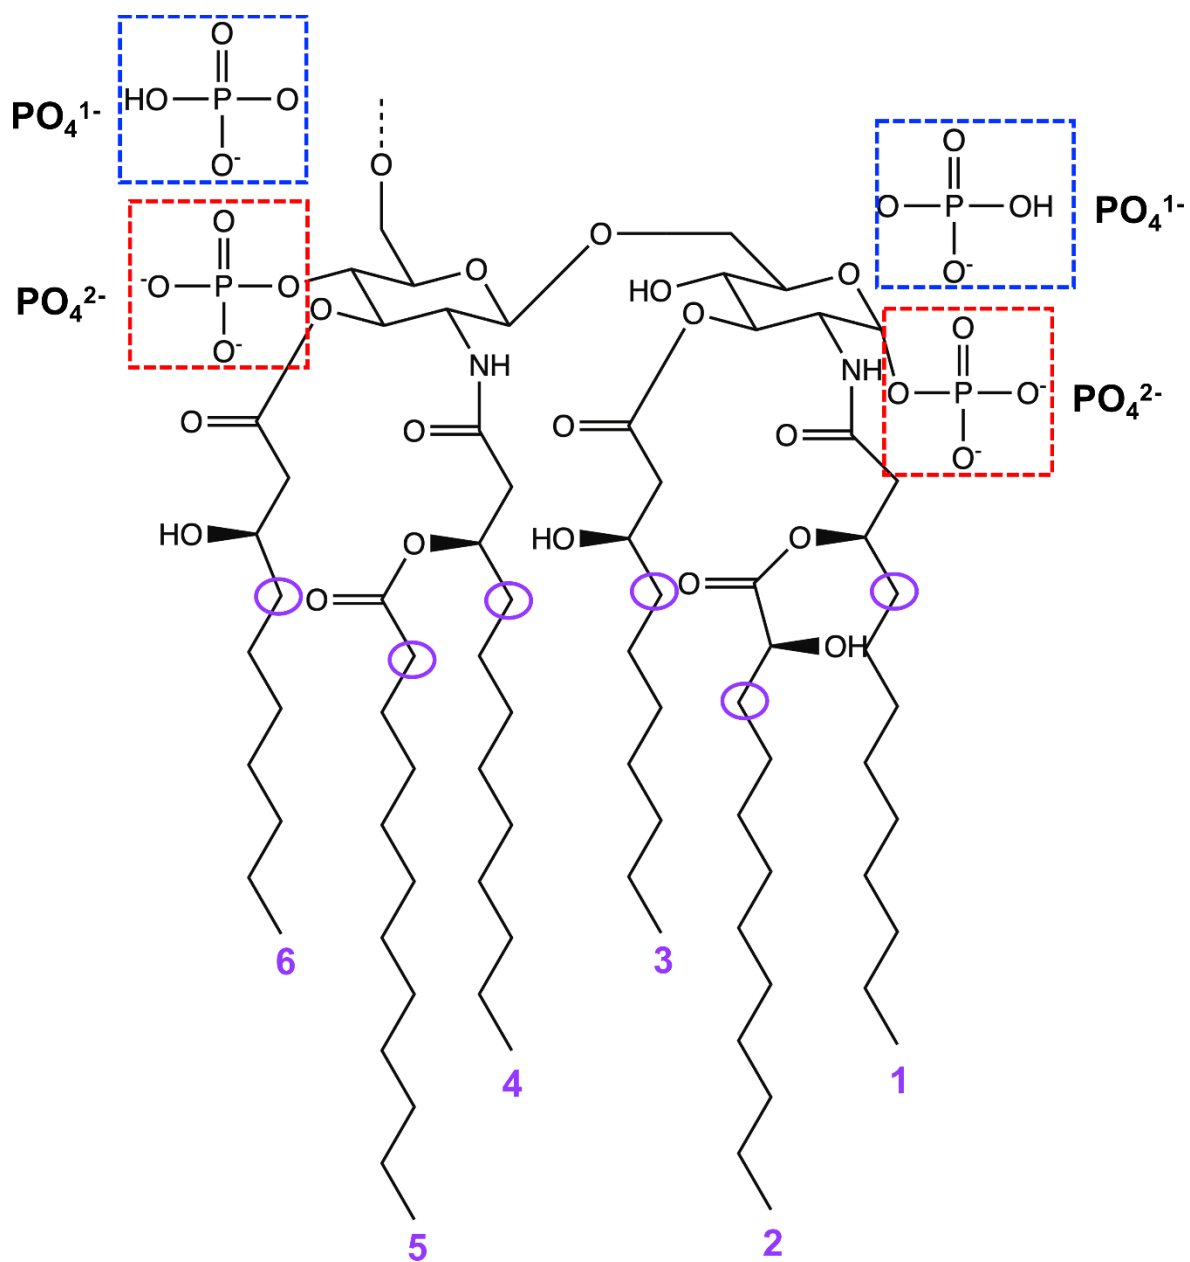

**Figure S2.** Chemical structures of *P. aeruginosa* lipid A. Carbons in the purple ovals are used to calculate the hydrophobic thickness.

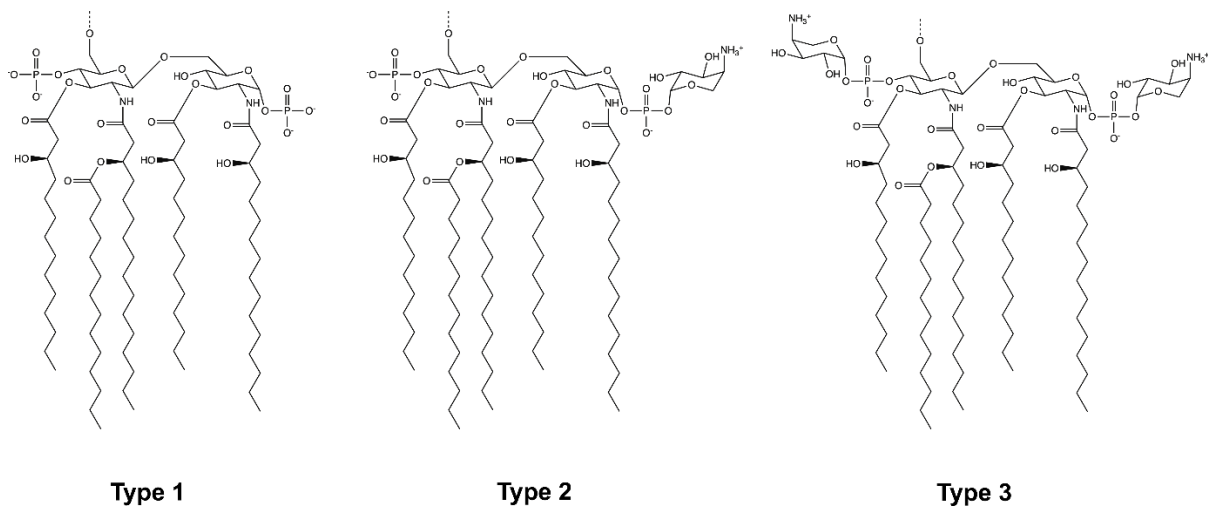

**Figure S3.** Chemical structures of three types of *B. cepacia* lipid A.

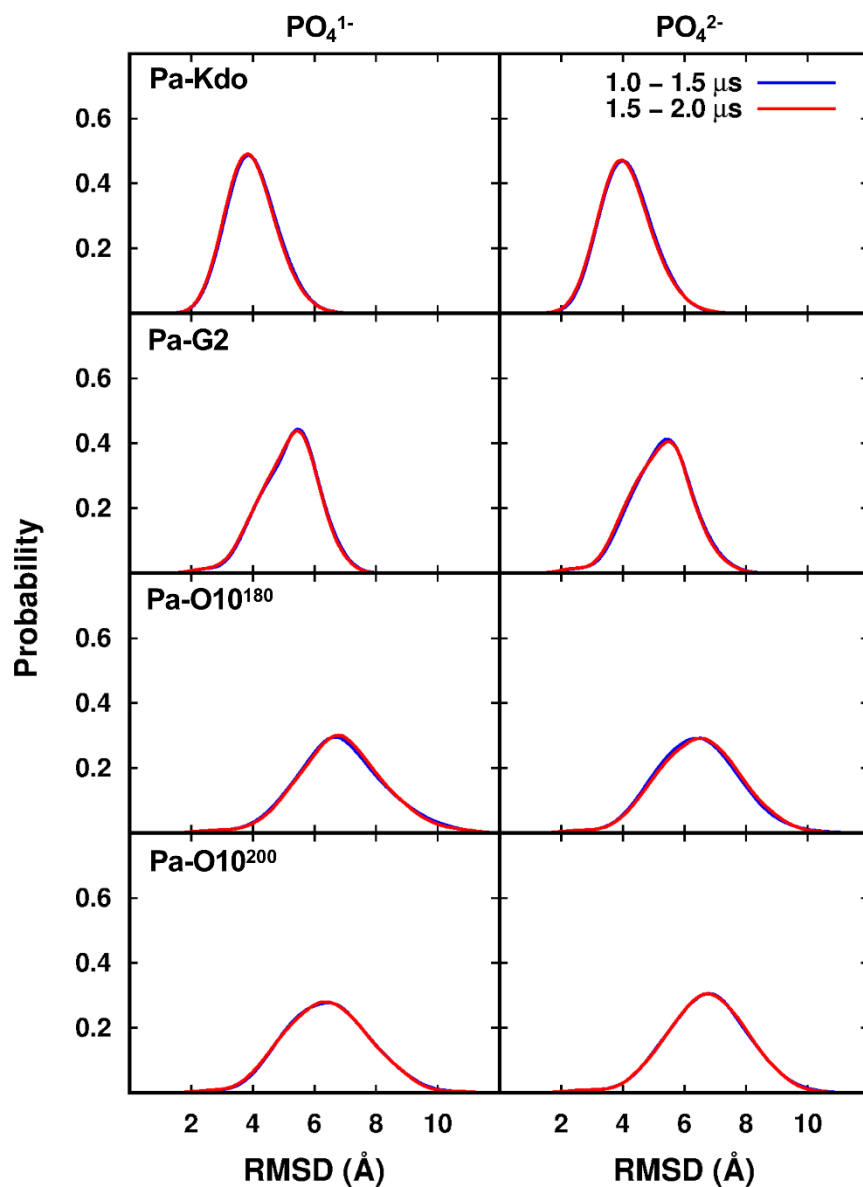

**Figure S4.** Comparisons of pairwise RMSD distributions (of the entire LPS) with two phosphate protonation states between 1.0 – 1.5 μs and 1.5 – 2.0 μs standard simulations for each Pa system.

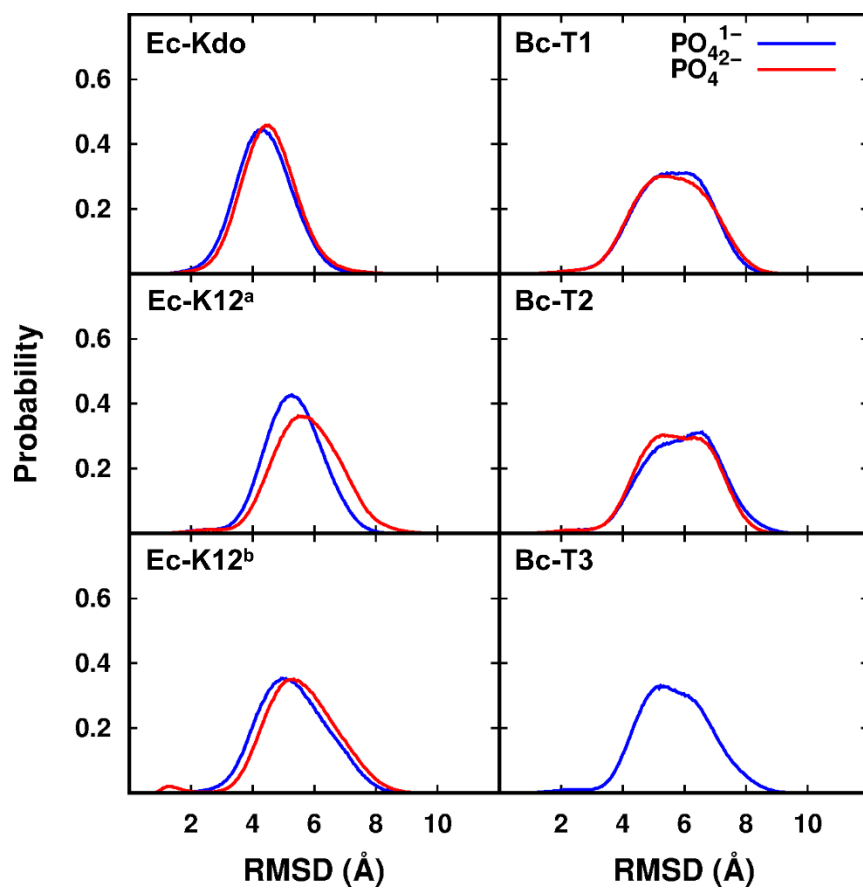

**Figure S5.** Comparisons of pairwise RMSD distributions (of the entire LPS) between two phosphate protonation states for each Ec and Bc systems. Ec-K12<sup>a</sup> and Ec-K12<sup>b</sup> are for Hep with -2e or -1e phosphate group, respectively.

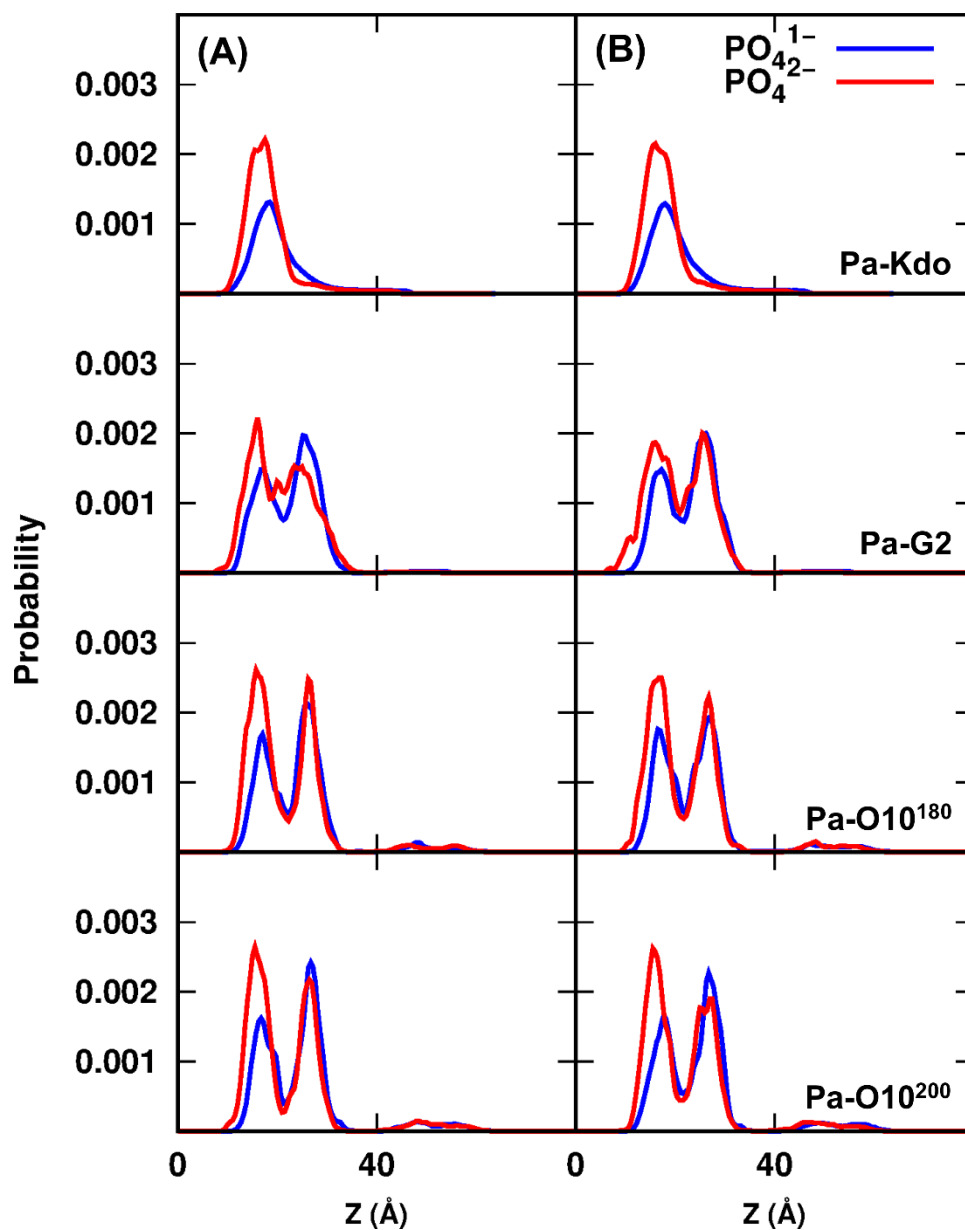

**Figure S6.** Comparisons of distributions of Ca<sup>2+</sup> ions along the Z-axis (i.e., the membrane normal) between two phosphate protonation states for each Pa systems in (A) standard and (B) HMR simulations. In the distributions, only the Z > 0 membrane portion up to Z = 80 Å is shown after symmetrization.

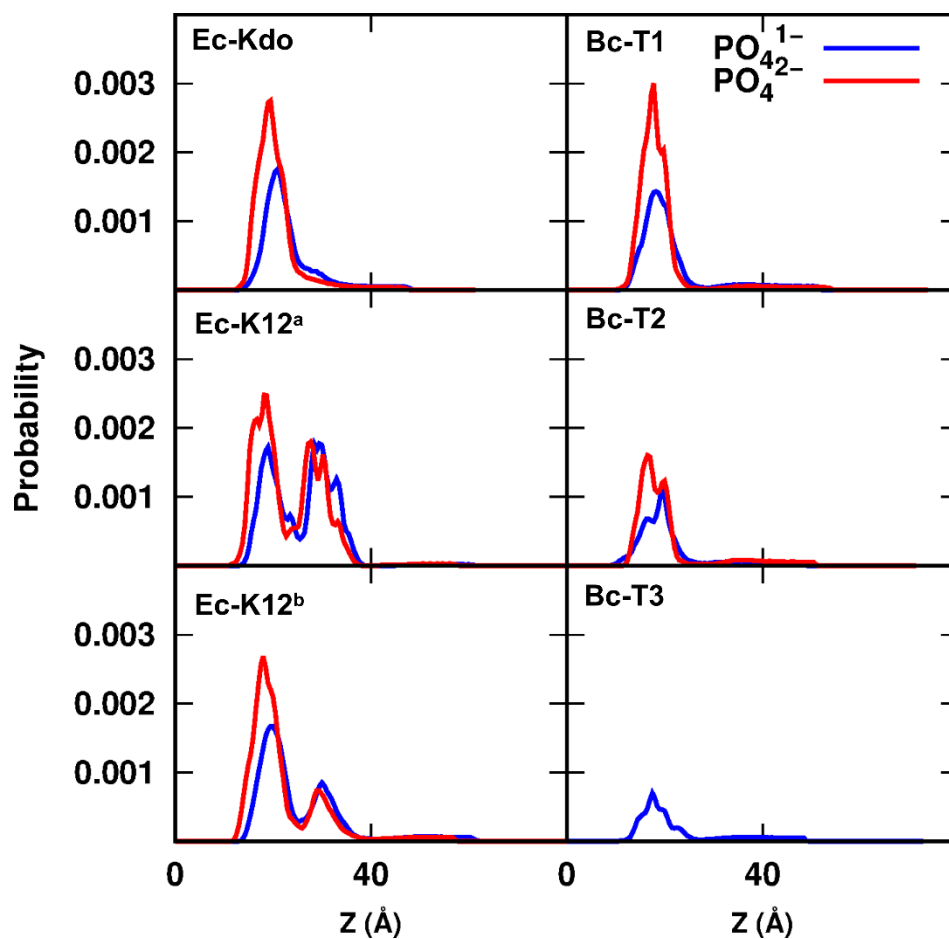

**Figure S7.** Comparisons of distributions of  $\text{Ca}^{2+}$  ions along the Z-axis (i.e., the membrane normal) between two phosphate protonation states for each Ec and Bc systems. Ec-K12<sup>a</sup> and Ec-K12<sup>b</sup> are for Hep with -2e or -1e phosphate group, respectively. In the distributions, only the  $Z > 0$  membrane portion up to  $Z = 80 \text{ \AA}$  is shown after symmetrization.



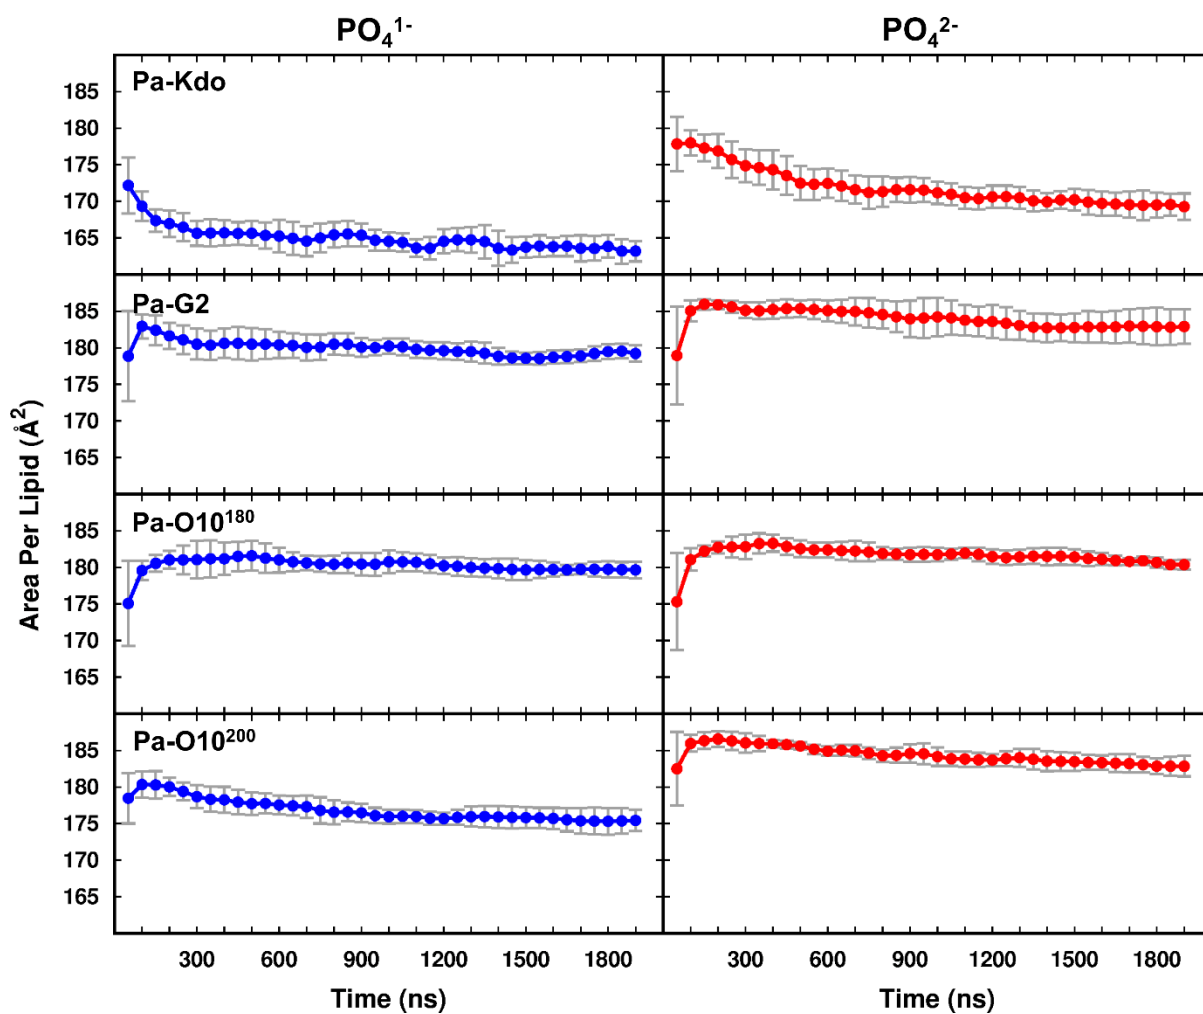

**Figure S8.** Time series of averaged APL every 100 ns for each Pa system in both protonation states and its corresponding standard errors.

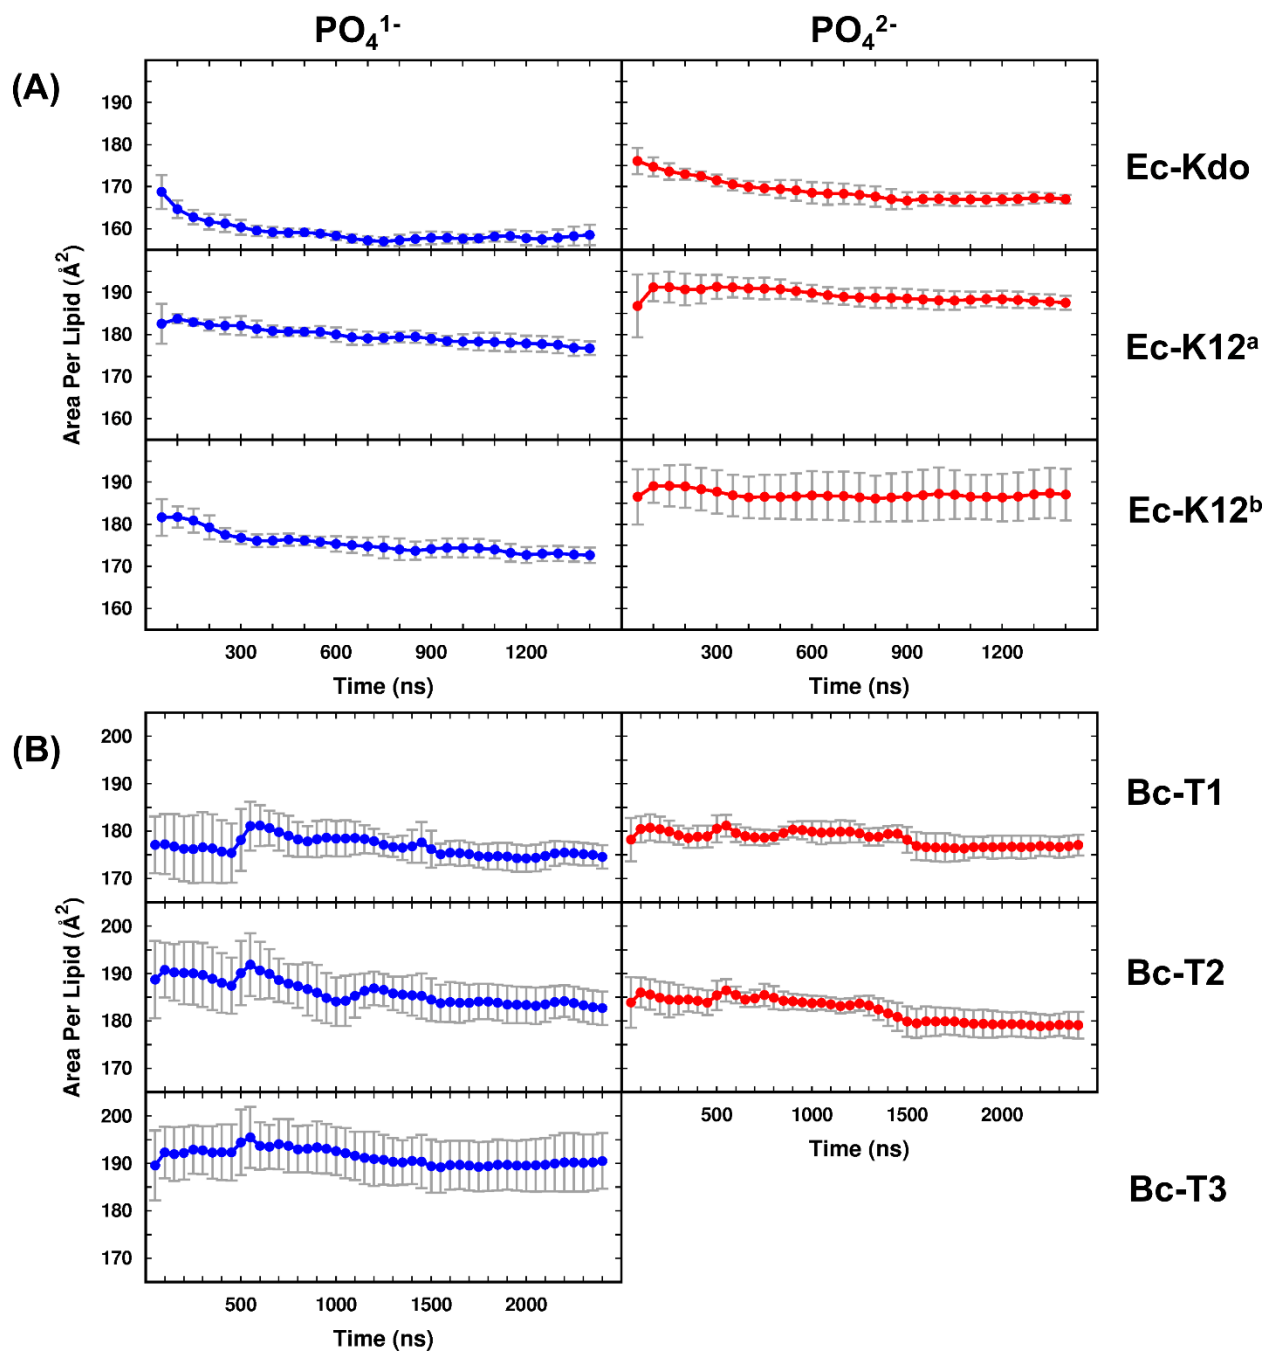

**Figure S9.** Time series of area per lipid for each Ec (A) and Bc (B) systems in both protonation states.

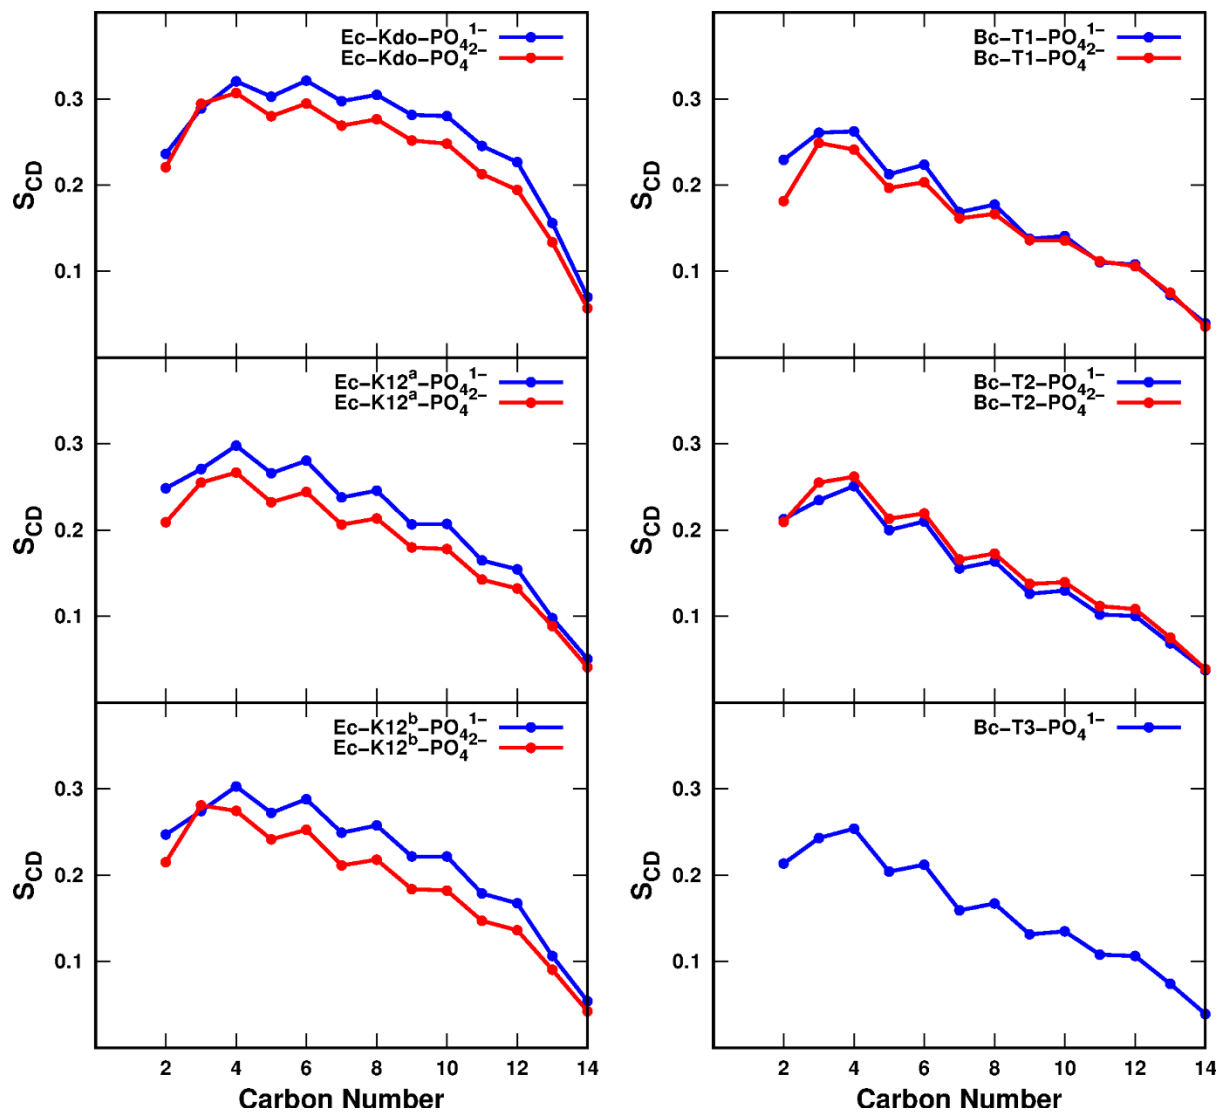

**Figure S10.** Calculated chain order parameters for acyl chain 2 of lipid A for each Ec and Bc system with two phosphate protonation states.

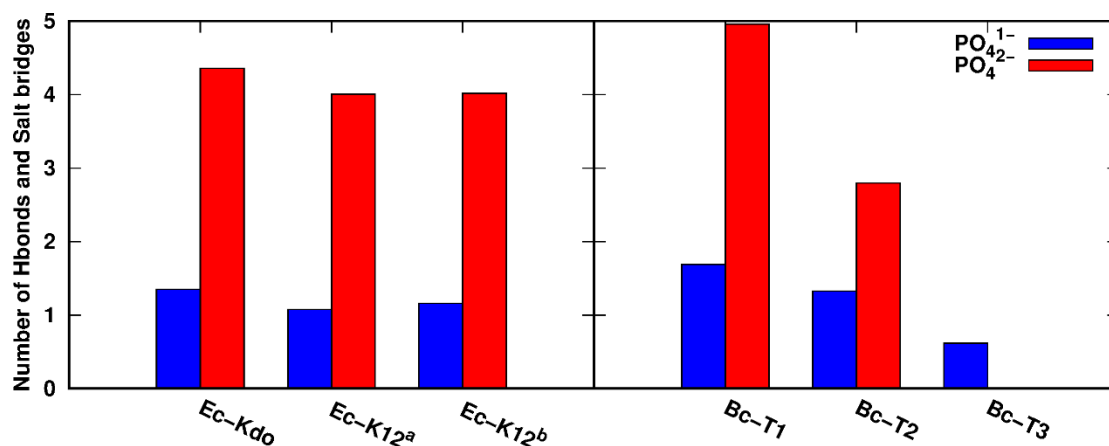

**Figure S11.** Sum of the per-LPS average number of inter-lipid A hydrogen bonds and the per-LPS average salt bridges between  $\text{Ca}^{2+}$  and phosphate groups for each Ec and Bc system with two phosphate protonation states. A hydrogen bond is counted when the distance between the donor and acceptor is less than 3 Å and the angle is larger than 120°. A salt bridge is counted when the distance between  $\text{Ca}^{2+}$  and any atom on phosphate groups of lipid A is less than 4 Å.

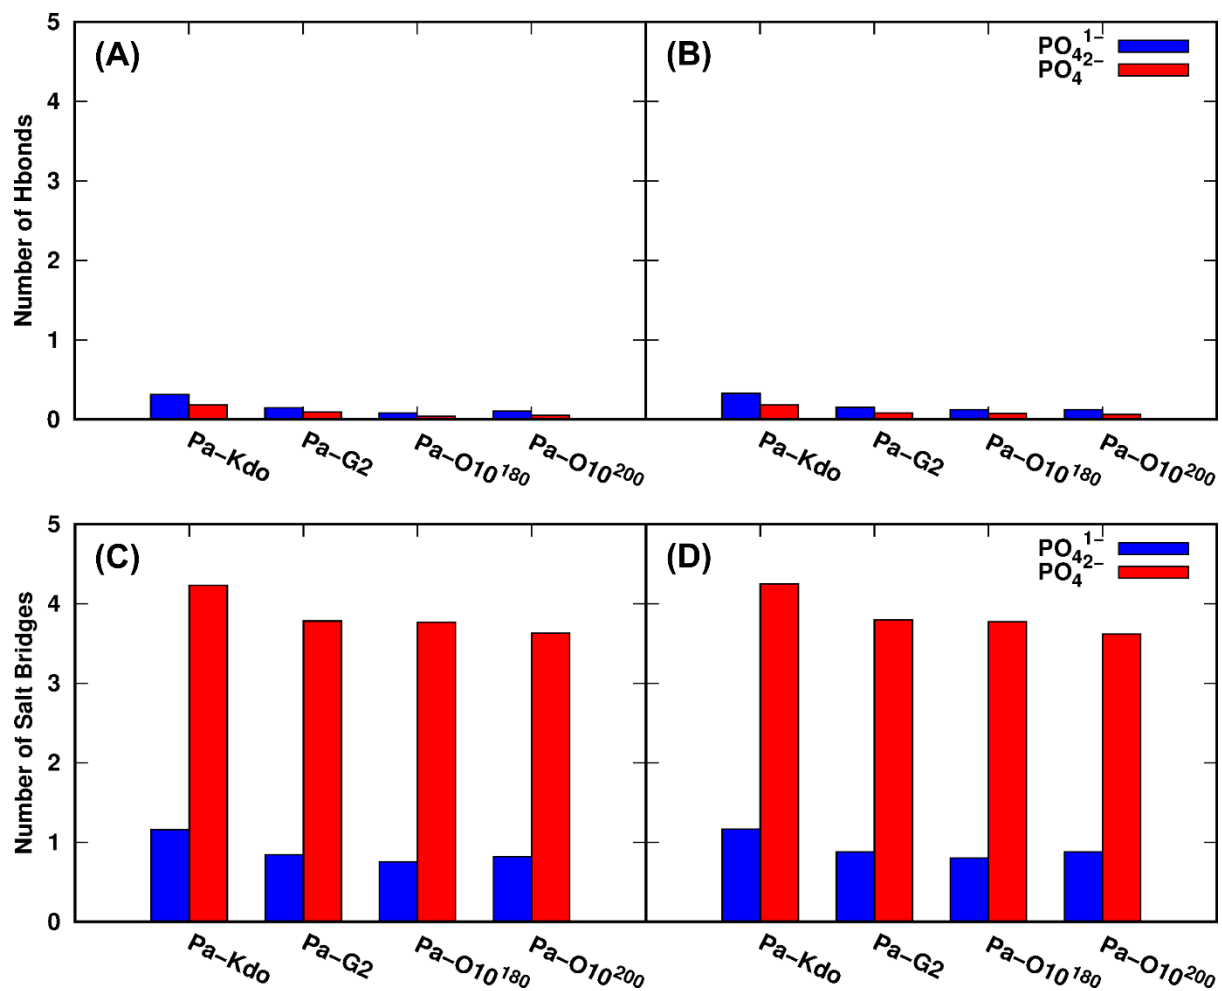

**Figure S12.** Per-LPS average number of (A, B) inter-lipid A hydrogen bonds and (C, D) salt bridges between  $\text{Ca}^{2+}$  and any atom on phosphate groups of lipid A for each Pa system: (A, C) standard and (B, D) HMR simulations.

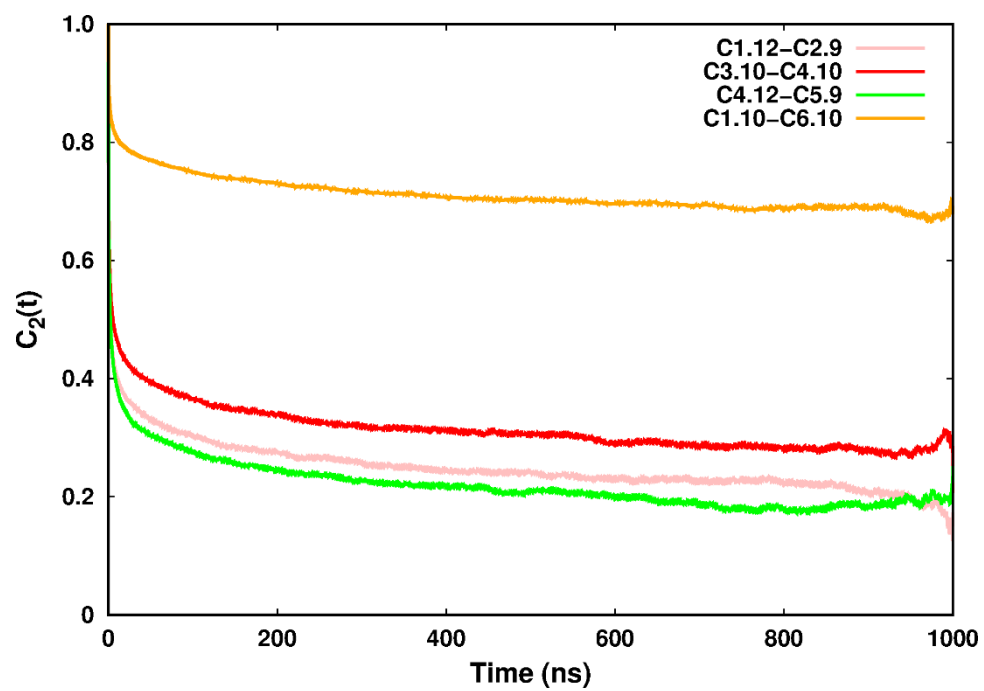

**Figure S13.** Correlation function  $C_2(t)$  for the cross acyl chains in Pa-O10 system.

**Table S1.** Averaged area per lipid and hydrophobic thickness with standard errors for each Pa system in standard and HMR simulations with two phosphate protonation states.

| System                | Protonation State  | Area Per Lipid ( $\text{\AA}^2$ ) |                 | Hydrophobic Thickness ( $\text{\AA}$ ) |                |
|-----------------------|--------------------|-----------------------------------|-----------------|----------------------------------------|----------------|
|                       |                    | OpenMM 2-fs                       | OpenMM HMR      | OpenMM 2-fs                            | OpenMM HMR     |
| Pa-Kdo                | $\text{PO}_4^{1-}$ | $163.2 \pm 1.4$                   | $163.2 \pm 1.7$ | $18.6 \pm 0.2$                         | $18.6 \pm 0.2$ |
|                       | $\text{PO}_4^{2-}$ | $169.3 \pm 1.8$                   | $169.8 \pm 1.3$ | $17.9 \pm 0.2$                         | $17.9 \pm 0.2$ |
| Pa-G2                 | $\text{PO}_4^{1-}$ | $179.2 \pm 1.1$                   | $178.5 \pm 1.3$ | $17.0 \pm 0.1$                         | $17.0 \pm 0.2$ |
|                       | $\text{PO}_4^{2-}$ | $182.9 \pm 2.4$                   | $181.2 \pm 1.5$ | $16.6 \pm 0.2$                         | $16.8 \pm 0.2$ |
| Pa-O10 <sup>180</sup> | $\text{PO}_4^{1-}$ | $179.7 \pm 1.1$                   | $177.8 \pm 1.1$ | $16.9 \pm 0.1$                         | $17.1 \pm 0.1$ |
|                       | $\text{PO}_4^{2-}$ | $180.4 \pm 0.7$                   | $178.9 \pm 1.5$ | $16.8 \pm 0.1$                         | $16.9 \pm 0.2$ |
| Pa-O10 <sup>200</sup> | $\text{PO}_4^{1-}$ | $175.4 \pm 1.5$                   | $175.8 \pm 0.5$ | $17.3 \pm 0.2$                         | $17.2 \pm 0.1$ |
|                       | $\text{PO}_4^{2-}$ | $182.9 \pm 1.4$                   | $182.1 \pm 1.6$ | $16.5 \pm 0.1$                         | $16.7 \pm 0.1$ |

**Table S2.** Averaged area per lipid and hydrophobic thickness with standard errors for each Ec/Bc system with two phosphate protonation states.

| System              | Protonation State  | Area Per Lipid ( $\text{\AA}^2$ ) | Hydrophobic Thickness ( $\text{\AA}$ ) |
|---------------------|--------------------|-----------------------------------|----------------------------------------|
| Ec-Kdo              | $\text{PO}_4^{1-}$ | $158.6 \pm 2.4$                   | $24.3 \pm 0.3$                         |
|                     | $\text{PO}_4^{2-}$ | $167.0 \pm 1.1$                   | $23.2 \pm 0.2$                         |
| Ec-K12 <sup>a</sup> | $\text{PO}_4^{1-}$ | $176.7 \pm 1.6$                   | $21.8 \pm 0.3$                         |
|                     | $\text{PO}_4^{2-}$ | $187.5 \pm 1.7$                   | $20.7 \pm 0.3$                         |
| Ec-K12 <sup>b</sup> | $\text{PO}_4^{1-}$ | $172.7 \pm 1.8$                   | $22.3 \pm 0.3$                         |
|                     | $\text{PO}_4^{2-}$ | $187.0 \pm 6.2$                   | $20.8 \pm 0.7$                         |
| Bc-T1               | $\text{PO}_4^{1-}$ | $174.6 \pm 2.5$                   | $20.0 \pm 0.3$                         |
|                     | $\text{PO}_4^{2-}$ | $177.1 \pm 2.2$                   | $19.7 \pm 0.3$                         |
| Bc-T2               | $\text{PO}_4^{1-}$ | $182.7 \pm 3.5$                   | $19.1 \pm 0.3$                         |
|                     | $\text{PO}_4^{2-}$ | $179.1 \pm 2.8$                   | $19.6 \pm 0.3$                         |
| Bc-T3               | $\text{PO}_4^{1-}$ | $190.5 \pm 5.9$                   | $18.4 \pm 0.6$                         |
